# Supplementary material
Source: PubMed Central journal article supplement (PMC3737342)

## **Supplemental Material to:**

**Stephanie Hein, Ingeborg Scholz, Björn Voß  
and Wolfgang R. Hess**

**SF CRISPR: Adaptation and modification of  
CRISPR loci in two closely related cyanobacteria**

**2013; 10(5)**

**<http://dx.doi.org/10.4161/rna.24160>**

**[www.landesbioscience.com/journals/rnabiology/article/24160/](http://www.landesbioscience.com/journals/rnabiology/article/24160/)**

C3

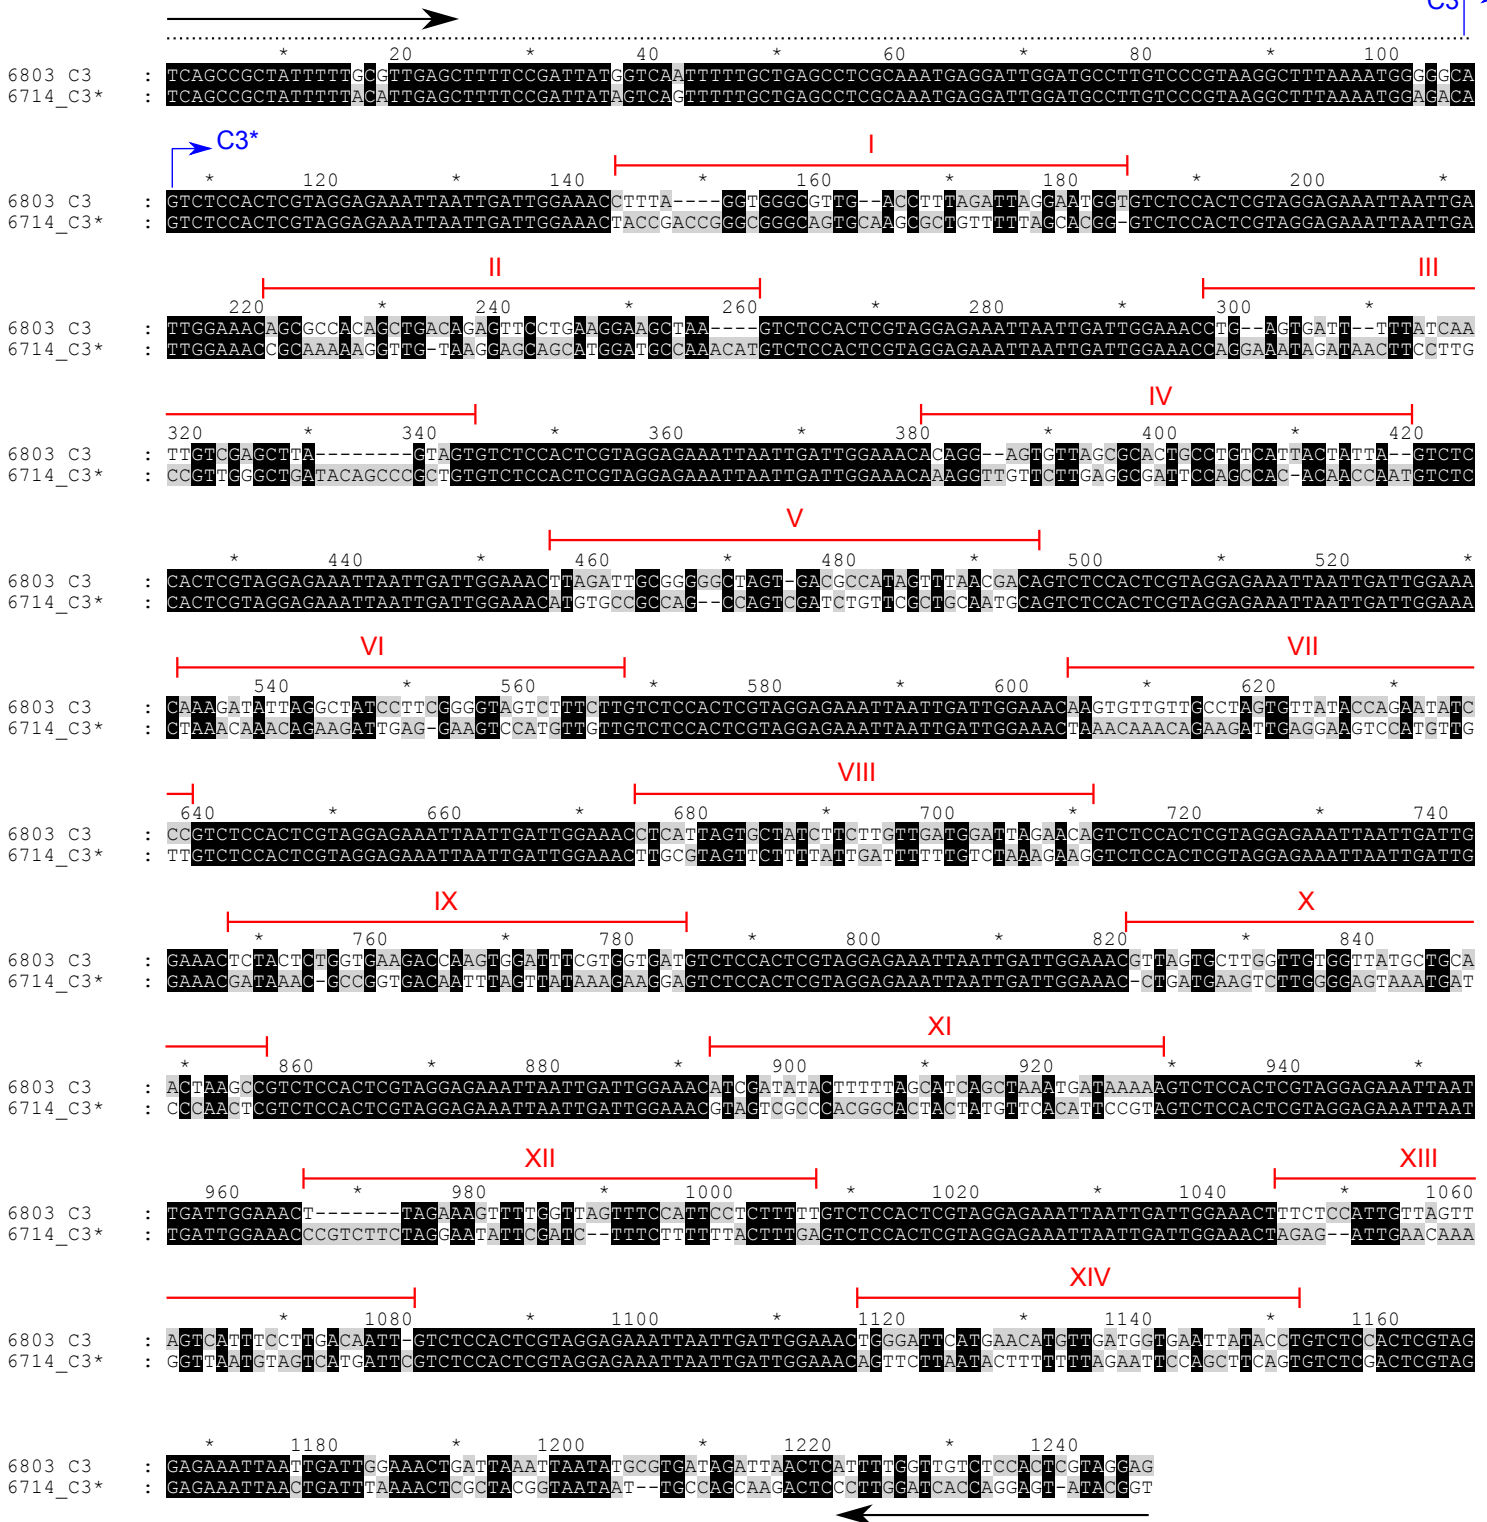

*sly4000950*

*sly4000940*

*sly4000930*

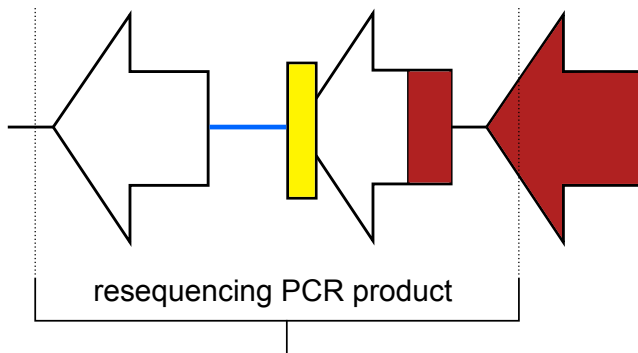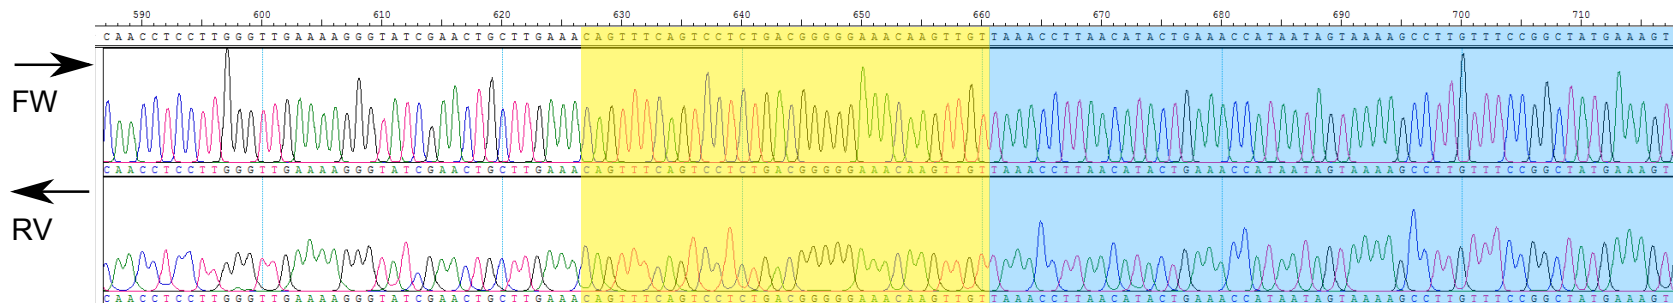

Supplement: rna-10-852-s01.pdf [file rna-10-852-s01.pdf]
